# Supplementary material for: Physical activity, sedentary time and their associations with clustered metabolic risk among people with type 2 diabetes in Jiangsu province: a cross-sectional study
Source: PubMed Central journal article supplement — BMJ Open. 2019 Aug 22;9(8):e027906. doi: 10.1136/bmjopen-2018-027906 (PMC6707692; doi:10.1136/bmjopen-2018-027906), 2019-08-22
Supplement: bmjopen-2018-027906supp001.pdf [file bmjopen-2018-027906supp001.pdf]

**Table S1.** Classification table of physical activity and sedentary behaviour

| Physical activity in Farm work, occupation and household chores                                                                                                                                                                                                                                                                                                                                                                                                                                                                                                                    |                                                                                                                                                                                                                                                                                                                                                                                                                                                                                                                                                                                                                                                       | Physical activity in leisure-time                                                                                                                                                                                                                                            |                                                                                                                                                                                                                                                                                                            | Static behavior                                                                                                                                                                                                                          |
|------------------------------------------------------------------------------------------------------------------------------------------------------------------------------------------------------------------------------------------------------------------------------------------------------------------------------------------------------------------------------------------------------------------------------------------------------------------------------------------------------------------------------------------------------------------------------------|-------------------------------------------------------------------------------------------------------------------------------------------------------------------------------------------------------------------------------------------------------------------------------------------------------------------------------------------------------------------------------------------------------------------------------------------------------------------------------------------------------------------------------------------------------------------------------------------------------------------------------------------------------|------------------------------------------------------------------------------------------------------------------------------------------------------------------------------------------------------------------------------------------------------------------------------|------------------------------------------------------------------------------------------------------------------------------------------------------------------------------------------------------------------------------------------------------------------------------------------------------------|------------------------------------------------------------------------------------------------------------------------------------------------------------------------------------------------------------------------------------------|
| <b>Moderate-intensity physical activity (4 MET h/d)</b><br>Make breathing and heart beat slightly faster                                                                                                                                                                                                                                                                                                                                                                                                                                                                           | <b>Vigorous-intensity physical activity (8 MET h/d)</b><br>Make breathing and heart rate significantly faster                                                                                                                                                                                                                                                                                                                                                                                                                                                                                                                                         | <b>Moderate-intensity physical activity (4 MET h/d)</b><br>Make breathing and heart beat slightly faster                                                                                                                                                                     | <b>Vigorous-intensity physical activity (8 MET h/d)</b><br>Make breathing and heart rate significantly faster                                                                                                                                                                                              | Lying, sitting and leaning besides sleep time (h/d)                                                                                                                                                                                      |
| <ul style="list-style-type: none"> <li>·<b>Cleaning</b>(e.g. vacuuming, mopping the floor, polishing floor, wiping the desk, sweeping the floor, ironing clothes )</li> <li>·<b>Washing</b> (e.g. scrubbing the carpet, washing clothes)</li> <li>·<b>Gardening</b> (e.g. watering, turning soil, fertilizing)</li> <li>·<b>Hand milking</b></li> <li>·<b>Hand knitting</b></li> <li>·<b>carpenter work</b> (e.g. sawing cork, Chiseling cork)</li> <li>·<b>With a shovel and other tools to mix the sand and cement</b></li> <li>·<b>Walking with a general weight</b></li> </ul> | <ul style="list-style-type: none"> <li>·<b>Forestry workers</b> (felling and handling timber)</li> <li>·<b>Sawing ironwood</b></li> <li>·<b>tilling land</b></li> <li>·<b>transplant rice seedlings</b></li> <li>·<b>harvesting crops</b> (e.g. wheat, rice, sugarcane)</li> <li>·<b>Gardening</b> (e.g. digging, carrying heavy things)</li> <li>·<b>hand milling</b> (with wooden club or stone mill)</li> <li>·<b>architectural work</b> (e.g. building a wall, handing building materials)</li> <li>·<b>Fitness Trainer</b> (e.g. spinning, aerobics, yoga and some other aerobic exercise)</li> <li>·<b>A courier on foot or bike</b></li> </ul> | <ul style="list-style-type: none"> <li>·<b>biking</b></li> <li>·<b>jogging</b></li> <li>·<b>dancing</b></li> <li>·<b>reading a horse</b></li> <li>·<b>practicing Tai chi</b></li> <li>·<b>Practicing Yoga and pilates</b></li> <li>·<b>doing the yangko dance</b></li> </ul> | <ul style="list-style-type: none"> <li>·<b>Long-distance running</b></li> <li>·<b>playing football</b></li> <li>·<b>playing rugby</b></li> <li>·<b>playing tennis</b></li> <li>·<b>spinning in gym</b></li> <li>·<b>Lifting barbell</b></li> <li>·<b>doing ballet</b></li> <li>·<b>swimming</b></li> </ul> | <ul style="list-style-type: none"> <li>·<b>working</b></li> <li>·<b>studying</b></li> <li>·<b>reading</b></li> <li>·<b>watching TV</b></li> <li>·<b>using computer</b></li> <li>·<b>riding</b></li> <li>·<b>taking a rest</b></li> </ul> |

|                                                                                  |                                                                     |  |  |  |
|----------------------------------------------------------------------------------|---------------------------------------------------------------------|--|--|--|
| <ul style="list-style-type: none"><li>·Carrying water</li><li>·Grazing</li></ul> | <ul style="list-style-type: none"><li>·Pulling a rickshaw</li></ul> |  |  |  |
|----------------------------------------------------------------------------------|---------------------------------------------------------------------|--|--|--|
