# Supplementary material for: Physical activity, sedentary time and their associations with clustered metabolic risk among people with type 2 diabetes in Jiangsu province: a cross-sectional study
Source: PubMed Central journal article supplement — BMJ Open. 2019 Aug 22;9(8):e027906. doi: 10.1136/bmjopen-2018-027906 (PMC6707692; doi:10.1136/bmjopen-2018-027906), 2019-08-22
Supplement: bmjopen-2018-027906supp004.pdf [file bmjopen-2018-027906supp004.pdf]

**Table S4** Cross-sectional linear regression analysis of association of physical activity and sedentary time with clustered metabolic risk

| Metabolic risk | Physical activity (per-SD) † |                          |                         |                         | Sedentary time<br>(per-SD) † |
|----------------|------------------------------|--------------------------|-------------------------|-------------------------|------------------------------|
|                | Total                        | Occupational             | Commuting               | Leisure-time            |                              |
| zMS‡           |                              |                          |                         |                         |                              |
| Model 1        | -0.087(-0.120, -0.054)***    | -0.067(-0.100,-0.033)*** | -0.054(-0.088,-0.021)** | -0.058(-0.091,-0.025)** | 0.131(0.097, 0.164)***       |
| Model 2        | -0.050(-0.079, -0.021)***    | -0.033(-0.063,-0.004)*   | -0.019(-0.048, 0.010)   | -0.038(-0.067,-0.010)*  | 0.085(0.056, 0.113)***       |
| Model 3        | -0.050(-0.079, -0.021)***    | -0.026(-0.055, 0.003)    | -0.018(-0.047, 0.011)   | -0.037(-0.066,-0.008)*  | 0.082(0.053, 0.110)***       |
| Model 4        | -0.043(-0.072, -0.014)***    | -0.026(-0.056, 0.003)    | -0.018(-0.047, 0.011)   | -0.036 (-0.065,-0.007)* | 0.078(0.049, 0.107)***       |

Regression results are presented as unstandardized coefficients (B) (95%CI)

† Per-SD of physical activity =13.8 MET-h/d, Per-SD of occupational physical activity =12.6 MET-h/d, per-SD of commuting physical activity =3.2 MET-h/d, per-SD of leisure-time physical activity=3.4 MET-h/d, per-SD sedentary time = 2.5 h/d

‡ Delete the waist circumference to calculate new clustered metabolic score.

All models (except model 1) are adjusted for age, sex, education, annual household income, smoking status, alcohol consumption and diabetes duration. All outcomes except zMS and waist Circumference are additionally adjusted for waist circumference. Fasting plasma glucose is additional adjusted for the use of diabetes medication (yes/no); Triacylglycerol and HDL-cholesterol are additionally adjusted for the diagnosis of dyslipidemia (yes/no) and the use of lipid-lowering medication (yes/no/unclear); Systolic blood pressure is additionally adjusted for the diagnosis of hypertension(yes/no) and the use of antihypertension medication (yes/no/unclear); and zMS is additional adjusted for the use of diabetes medication (yes/no), lipid-lowering drugs (yes/no/unclear) and antihypertension medication (yes/no/unclear), the diagnosis of dyslipidemia (yes/no) and the diagnosis of hypertension(yes/no).

Model 3 is adjusted for remaining physical activity and sedentary time as appropriate; Model 4 is additional adjusted for sleep duration.

\*P < 0.05; \*\*P < 0.01; \*\*\*P < 0.001
